# Supplementary material for: Synthesis and characterization of O-PDI for futuristic optoelectronic and rectifier applications
Source: Royal Society of Chemistry journal article supplement (doi:10.1039/d3ma00723e), 2024-01-01
Supplement: d3ma00723e1.pdf [file d3ma00723e1.pdf]

## Supporting Information

### Synthesis and characterization of O-PDI for futuristic optoelectronic rectifier applications

Akash<sup>1,2</sup> and J.P. Tiwari<sup>1,2\*</sup>

<sup>1</sup>Advanced Materials and Devices Division, CSIR-National Physical Laboratory, K. S. Krishnan Marg, Pusa Road, New Delhi-110012, India.

<sup>2</sup>Academy of Scientific and Innovative Research (AcSIR), Ghaziabad-201002, India.

Figure S1: FT-IR Spectrum of O-PDI.

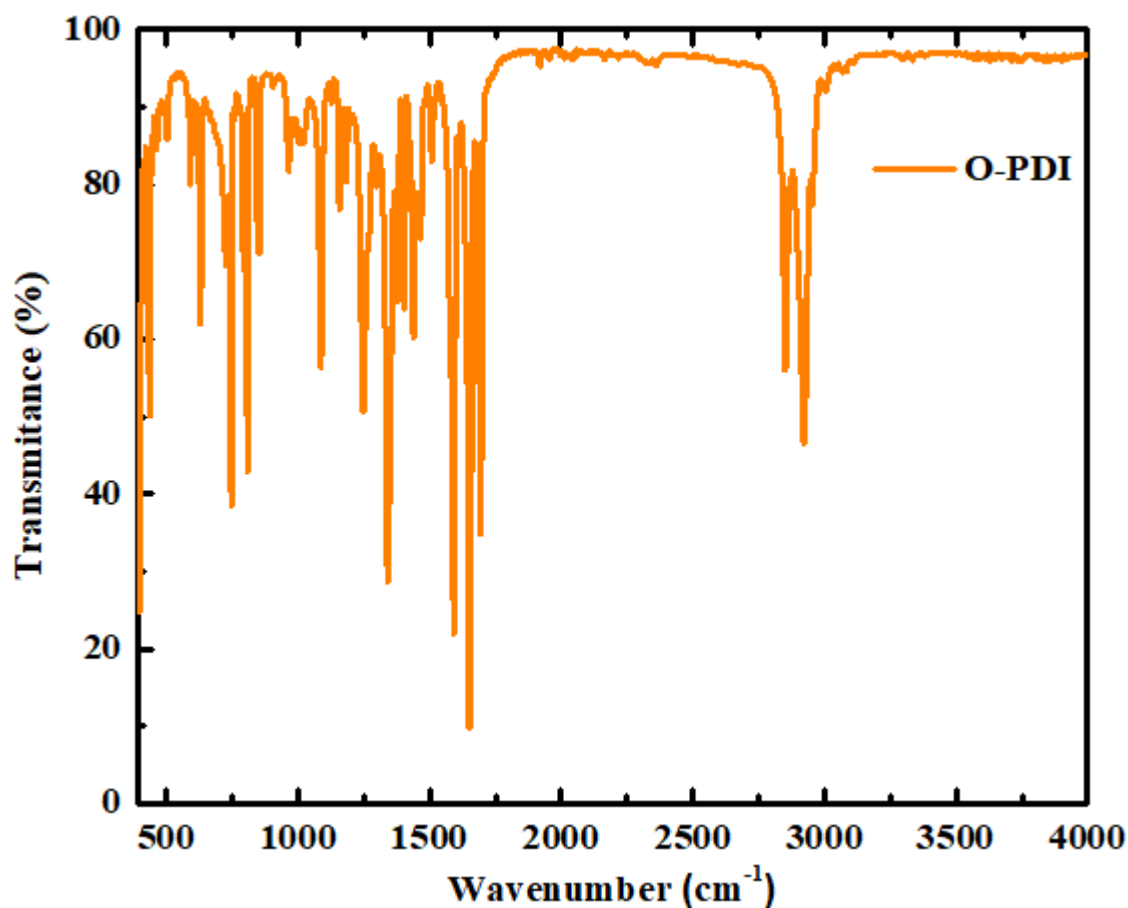

FT-IR ( $\tilde{\nu}$  cm<sup>-1</sup>) = 2922(C-H), 2850 (C-H), 1693 (-C=O), 1651 (-C=O), 1591 (-C=C-), 1577 (-C=C-), 1465 (CH<sub>3</sub> bend), 1438 (CH<sub>2</sub> bend), 1404 (C-N<sub>str</sub>), 1377 (CH<sub>3</sub> sym), 746 (C=C<sub>cis alkene</sub>), 727 (C=C<sub>cis alkene</sub>), 630 (-N-C=O bend), 435 (C-N-C bend).

Figure S2: NMR Spectrum of OPDI (a) Proton NMR, (b) carbon NMR.

BKS\_AK-0-PDZ  
single\_pulse

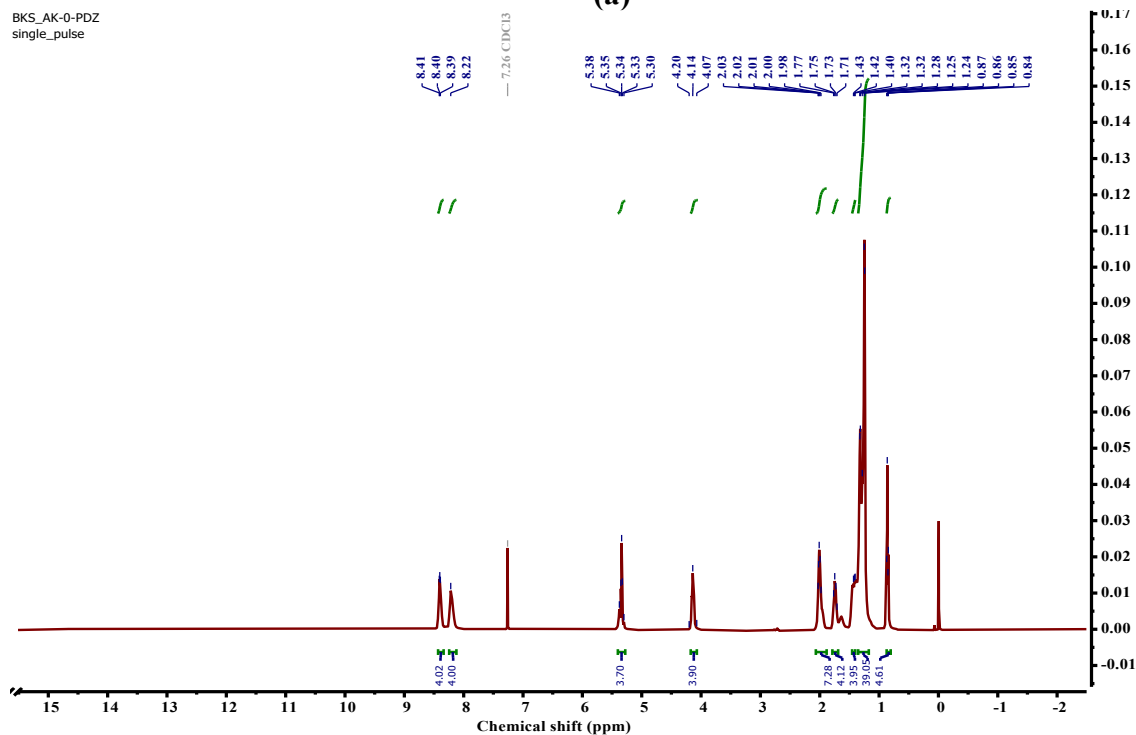

Feb16-2023-nmr.11.1.1r  
D-PDZ

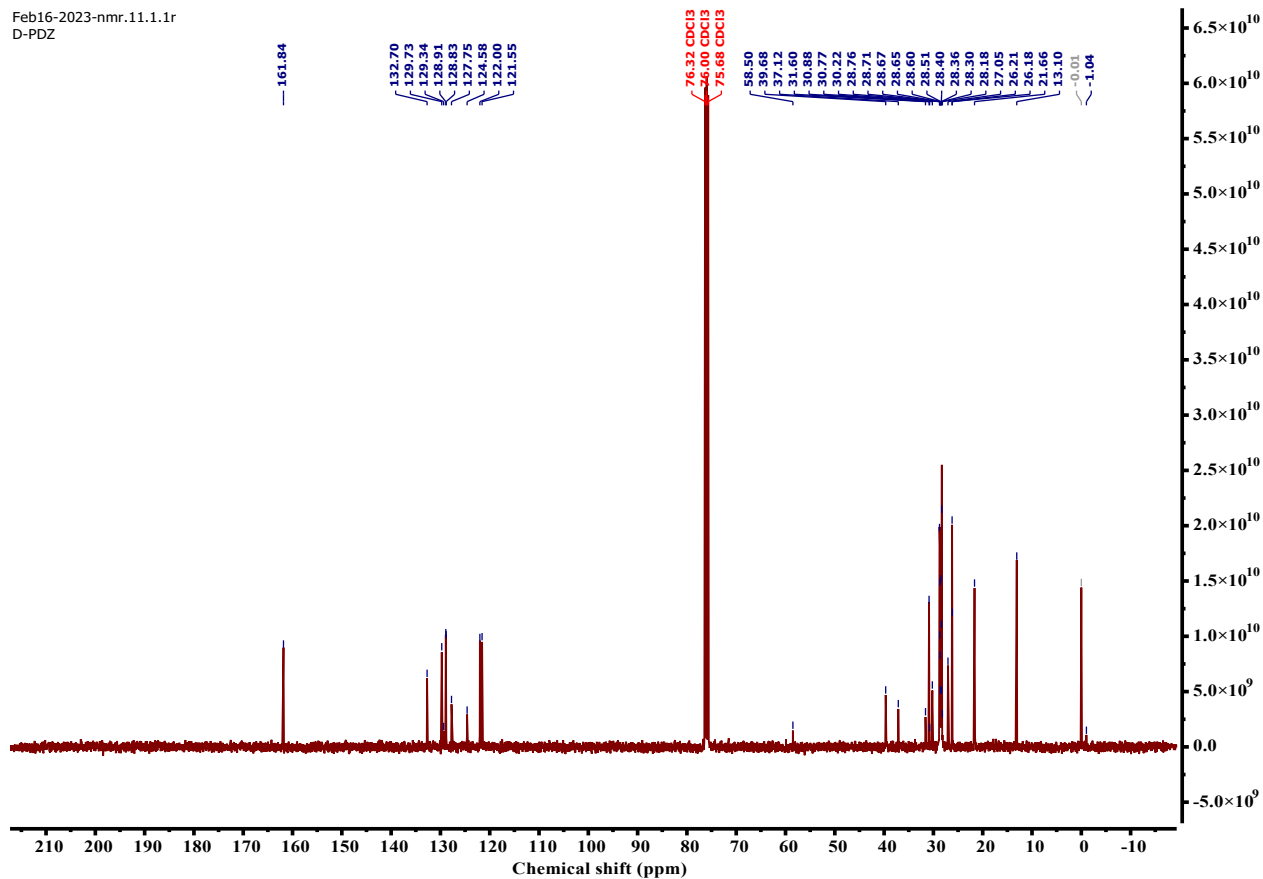

**<sup>1</sup>H NMR (400 MHz, CHLOROFORM-*D*)**  $\delta$  8.4 (d, 4H), 8.2 (d, 4H), 5.35 (m, 4H), 4.14 (t, 4H), 1.98 (m, 8H), 1.77 (m, 4H), 1.42 (m, 4H), 1.25-1.29 (m, 40H), 0.86 (t, 6H).

**<sup>13</sup>C NMR (101 MHz, CDCl<sub>3</sub>)**  $\delta$  161.84, 132.70, 129.73, 129.34, 128.91, 128.83, 127.75, 124.58, 122.00, 121.55, 58.50, 39.68, 37.12, 31.60, 30.88, 30.77, 30.22, 28.76, 28.71, 28.67, 28.65, 28.60, 28.51, 28.40, 28.36, 28.30, 28.18, 27.05, 26.21, 26.18, 21.66, 13.10.

**Figure S3: MALDI-TOF Mass Spectrum of O-PDI.**

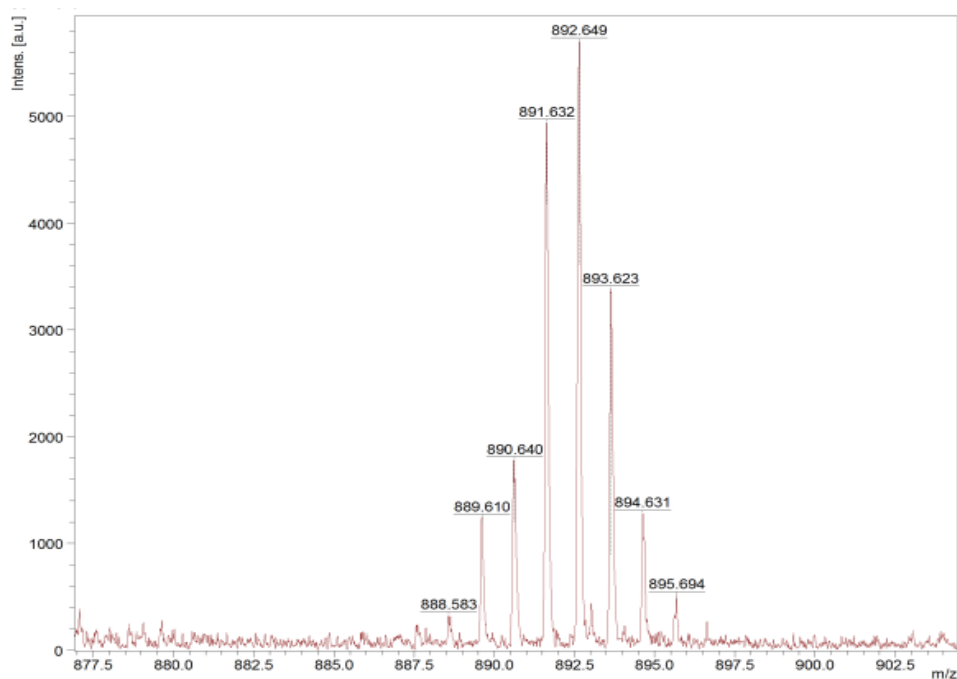

MALDI-TOF:  $m/z = 890.2427g$  Calculated for  $C_{60}H_{78}N_2O_4 = 890.640$

**Figure S4:** cyclic voltammetry of Ferrocene.

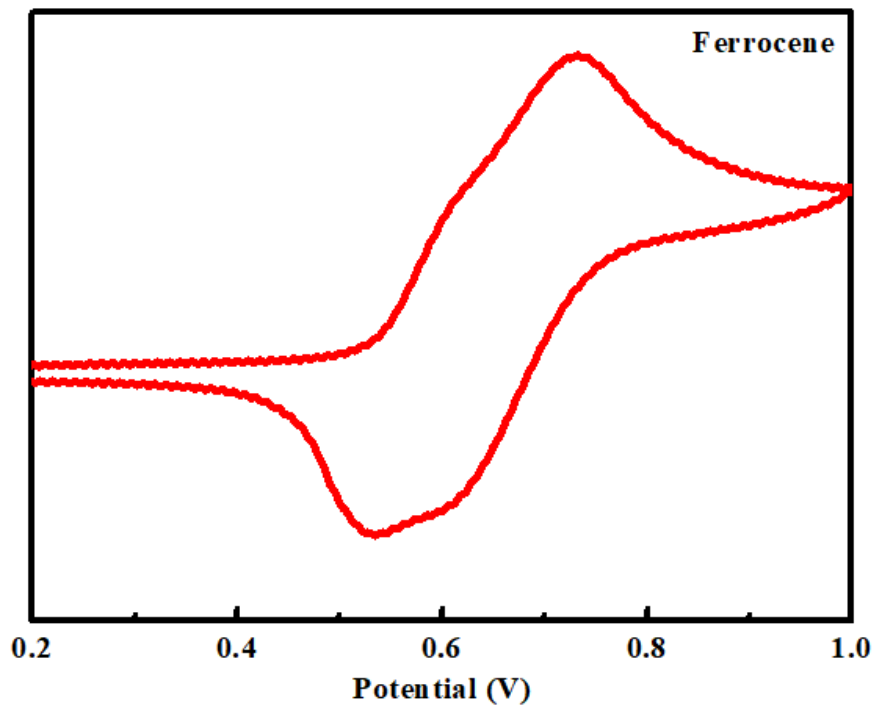

$$E_{\text{Fc}/\text{Fc}^+} = E_{\text{anode}} = 0.732\text{V}, E_{\text{cathode}} = 0.535\text{V},$$

$$E_{\text{Fc}/\text{Fc}^+} = 0.633\text{V}$$
